# Supplementary material for: Efflux Pump Inhibition and Resistance Modulation in Mycobacterium smegmatis by Peucedanum ostruthium and Its Coumarins
Source: MDPI journal article supplement (doi:10.3390/antibiotics10091075), 2021-09-05
Supplement: s1 [file s1]

# Supplementary Material

## Efflux pump inhibition and resistance modulation in *Mycobacterium smegmatis* by *Peucedanum ostruthium* and its coumarins

Katarina Šimunović, Julia Solnier, Fabian Alperth, Olaf Kunert, Sonja Smole Možina, Franz Bucar

Table S1: NMR Spectroscopic Data (700 MHz, CDCl<sub>3</sub>) for compound 1, 25 °C, TMS was used as internal standard.

| compound 1 |                   |                      | compound 1 |                       |                                            |
|------------|-------------------|----------------------|------------|-----------------------|--------------------------------------------|
| position   | $\delta_c$ , type | $\delta_H$ (J in Hz) | position   | $\delta_c$ , type     | $\delta_H$ (J in Hz)                       |
| 2          | 161.0, C          | -                    | 8a         | 152.6, C              | -                                          |
| 3          | 113.3, CH         | 6.32, d (9.7)        | 9          | 95.1, CH              | 7.21, s                                    |
| 4          | 139.0, CH         | 8.18, d (9.7)        | 9a         | 152.6, C              | -                                          |
| 4a         | 107.4, C          | -                    | 1'         | 74.5, CH <sub>2</sub> | 4.45, dd (9.8, 7.7)<br>4.54, dd (9.8, 2.8) |
| 5          | 148.4, C          | -                    | 2'         | 76.5, CH              | 3.91, dd (7.7, 2.7)                        |
| 5a         | 114.4, C          | -                    | 3'         | 71.7, C               | -                                          |
| 6          | 104.8, CH         | 6.99, d (2.3)        | 4'         | 25.2, CH <sub>3</sub> | 1.32, s                                    |
| 7          | 145.4, CH         | 7.62, d (2.3)        | 5'         | 26.7, CH <sub>3</sub> | 1.37, s                                    |

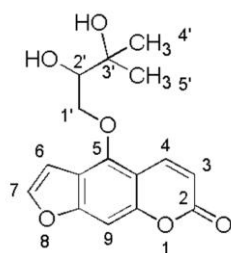

Figure S1. Oxypeucedanin hydrate (1)

Table S2: NMR Spectroscopic Data (700 MHz, CDCl<sub>3</sub>) for compound **6**, 25 °C, TMS was used as internal standard.

| compound <b>6</b> |                   |                      | compound <b>6</b> |                       |                      |
|-------------------|-------------------|----------------------|-------------------|-----------------------|----------------------|
| position          | $\delta_c$ , type | $\delta_H$ (J in Hz) | position          | $\delta_c$ , type     | $\delta_H$ (J in Hz) |
| 2                 | 161.4, C          | -                    | 1'                | 29.2, CH <sub>2</sub> | 3.40, d (7.2)        |
| 3                 | 113.2, CH         | 6.23, d (9.5)        | 2'                | 120.6, CH             | 5.30, m              |
| 4                 | 143.5, CH         | 7.60, d (9.5)        | 3'                | 139.9, C              | -                    |
| 4a                | 112.7, C          | -                    | 4'                | 39.7, CH <sub>2</sub> | 2.11, m              |
| 5                 | 128.4, CH         | 7.19, s              | 5'                | 26.3, CH <sub>2</sub> | 2.12, m              |
| 6                 | 124.6, C          | -                    | 6'                | 123.7, CH             | 5.06, m              |
| 7                 | 158.1, C          | -                    | 7'                | 132.2, C              | -                    |
| 8                 | 104.7, CH         | 6.78, s              | 8'                | 25.8, CH <sub>3</sub> | 1.68, s              |
| 8a                | 154.4, C          | -                    | 9'                | 17.7, CH <sub>3</sub> | 1.60, s              |
| 7-OH              | -                 | 7.60, s              | 10'               | 16.3, CH <sub>3</sub> | 1.77, s              |

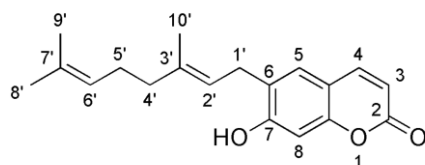

Figure S2. Ostruthin (**6**)

Table S3: Membrane integrity disruption (%) in *M. smegmatis* mc<sup>2</sup> 155 wild type and  $\Delta lfrA$  mutant after treatment with ethanol extract at concentrations of 0.25 and 0.125 x MIC (E 0.25 x MIC and E 0.125 x MIC), hexane extract at 0.25 and 0.125 x MIC (H 0.25 x MIC and H 0.125 x MIC), imperatorin at 0.25 x MIC, and ostruthin at 0.25 x MIC.

| Treatment            | Membrane integrity disruption (%) in <i>M. smegmatis</i> mc <sup>2</sup> 155 |              |               |              |
|----------------------|------------------------------------------------------------------------------|--------------|---------------|--------------|
|                      | wild type                                                                    |              | $\Delta lfrA$ |              |
| E 0.25xMIC           | -14.3                                                                        | ± 3.5        | -29.9         | ± 7.4        |
| E 0.125xMIC          | -38.2                                                                        | ± 3.6        | -23.5         | ± 6.6        |
| H 0.25xMIC           | -11.4                                                                        | ± 6.0        | -19.8         | ± 6.3        |
| H 0.125xMIC          | -20.5                                                                        | ± 3.1        | -19.9         | ± 3.3        |
| Imperatorin 0.25xMIC | <b>76.0</b>                                                                  | ± <b>4.1</b> | <b>86.1</b>   | ± <b>2.3</b> |
| Ostruthin 0.25xMIC   | -36.4                                                                        | ± 1.4        | -46.9         | ± 5.3        |
